# Supplementary material
Source: PubMed Central journal article supplement (PMC6816716)
Supplement: 12195_2019_574_MOESM1_ESM.pdf [file 12195_2019_574_MOESM1_ESM.pdf]

**Supplementary table 1.** Primer sequences

| <b>Oligo Name</b>       | <b>Sequence (5' to 3')</b> |
|-------------------------|----------------------------|
| couptfii- human forward | GAAGATGCAAGCGGTTTGGG       |
| couptfii- human reverse | CTCTGCACCGCAAACCATATT      |
| hey-1- human forward    | TACTCCTGCAAGTGCGTGG        |
| hey-1- human reverse    | GCACTCGTCGATCTCCTCAG       |
| efnb2- human forward    | ATAAAGACCAAGCAGACAGATGC    |
| efnb2- human reverse    | CAGAGGTTAGGGCTGAATTCTTG    |
| ephb4- human forward    | GTCCCGCGCGGAGTAT           |
| ephb4- human reverse    | TCAGCAGGGTCTCTTCCAAAG      |
| tbp- human forward      | CCGGCTGTTTAACTTCGCTT       |
| tbp- human reverse      | CCCTGGGTCACTGCAAAGAT       |
| dll4- human forward     | CAGCACTCCCTGGCAATGTA       |
| dll4- human reverse     | GTGGTGGGTGCAGTAGTTGA       |
| hgf- mouse forward      | TCGCAGTACCCTCACAAGC        |
| hgf- mouse reverse      | GATTCAGCCCCATCTGGATT       |
| cmet- mouse forward     | ATGGCACTTCACGCTATCATT      |
| cmet- mouse reverse     | AGGGTTTCCGGACCACATATTC     |
| vegf- mouse forward     | TAACGATGAAGCCCTGGAGT       |

---

|                       |                        |
|-----------------------|------------------------|
| vegfr- mouse reverse  | GCATTCACATCTGCTGTGCT   |
| Vegfr2- mouse forward | GGGGGAAACAAGATCGAAGT   |
| Vegfr2- mouse reverse | GCTTTGTTGATGGCTTCACAT  |
| Klf2- mouse forward   | CTCTCCATGGGATTGGACGG   |
| Klf2- mouse reverse   | TCCGGGTAGTAGAAGGCAGG   |
| tbp- mouse forward    | ACCCACCAGCAGTTCAGTAG   |
| tbp- mouse reverse    | CTGCTCTAACTTTAGCACCTGT |

---
